## COMMENTS AND RESPONSES

### Comment on: **Davidson et al. High-Dose Vitamin D Supplementation in People With Prediabetes and Hypovitaminosis D. Diabetes Care 2013;36:260-266**

**W**e have read with interest the work by Davidson et al. (1) reporting in this journal that in a non-Caucasian population with impaired fasting glycemia or impaired glucose tolerance and low vitamin D levels, vitamin D supplementation had no effect on estimates of insulin secretion, insulin sensitivity, or incident diabetes.

Our research group started a similar study (ClinicalTrials.gov number, NCT01183442) in Caucasians with postchallenge hyperglycemia (i.e., 2-h glucose  $\geq 140$  mg/dL), vitamin D deficiency, and coronary artery disease. As in the study by Davidson et al. (1) we had to prescreen a high number of patients ( $n = 1,814$ ). Five hundred seventy-nine were potentially eligible, of which only 178 were willing to undergo an oral glucose tolerance test and to participate in this 12-month study. Fifty-three (30%) had postchallenge hyperglycemia, and out of these only 42% had hypovitaminosis D. Finally, only 22 patients were randomized and the trial committee decided to stop the trial prematurely due to unfeasibility to recruit the intended number of 140 subjects.

Previous large-scale outcome trials in patients with impaired glucose tolerance have already demonstrated the need for screening large numbers of subjects to finally enroll the required number of participants. In the Nateglinide and Valsartan in Impaired Glucose Tolerance Outcomes Research (NAVIGATOR) trial 21.9% of the 43,502 subjects screened were finally randomized (2) while the Study To Prevent Non-Insulin-Dependent Diabetes Mellitus (STOP-NIDDM) trial randomized 9.6% of the 14,742 subjects screened (3).

If studies require vitamin D insufficiency as an additional inclusion criterion, recruitment becomes even more difficult. One reason could be that low vitamin D levels might represent a marker of reduced health status, and these subjects might be less likely to participate in intervention trials. In addition, because of the increasing number of epidemiological publications, suggesting a beneficial association of vitamin D with several health outcomes, the number of patients with vitamin D supplementation is steadily increasing.

Interestingly, currently 19 intervention trials investigating the impact of vitamin D supplementation on various outcome measures in subjects with impaired glucose tolerance or prediabetes are registered on [www.clinicaltrials.gov](http://www.clinicaltrials.gov). However, results have been published for only 2 of these mainly short-term studies, although half of the trials commenced at least 3 years ago.

Although subjects with postchallenge hyperglycemia seem to be an interesting target cohort to study the effect of vitamin D supplementation on glucose metabolism, investigators need to keep in mind that recruitment is challenging and that the number of patients needed to screen will likely be more than 10- to 15-fold higher than the number of patients finally enrolled when designing this kind of study.

NORBERT J. TRIPOLT, PHD<sup>1,2</sup>  
MICHAELA EDER<sup>1,2</sup>  
TATJANA STOJAKOVIC, MD<sup>3</sup>  
STEFAN PILZ, MD, PHD<sup>1</sup>  
THOMAS R. PIEBER, MD<sup>1</sup>  
HARALD SOURIJ, MD<sup>1,2</sup>

From the <sup>1</sup>Department for Internal Medicine, Division of Endocrinology and Metabolism, Medical University of Graz, Graz, Austria; the <sup>2</sup>Department of Endocrinology and Metabolism, Cardiovascular Diabetology Research Group, Medical University of Graz, Graz, Austria; and the <sup>3</sup>Clinical Institute of Medical and Chemical Laboratory Diagnostics, Medical University of Graz, Graz, Austria.

Corresponding author: Harald Sourij, [ha.sourij@medunigraz.at](mailto:ha.sourij@medunigraz.at).

DOI: 10.2337/dc13-0332

© 2013 by the American Diabetes Association. Readers may use this article as long as the work is properly cited, the use is educational and not for profit, and the work is not altered. See <http://creativecommons.org/licenses/by-nc-nd/3.0/> for details.

**Acknowledgments**—The work was supported by funds of the Oesterreichische Nationalbank (Anniversary Fund, project number 13699 to H.S.) and the Styrian Government (project A3-16.M-1/2011-25 to H.S.).

No potential conflicts of interest relevant to this article were reported.

#### References

- Davidson MB, Duran P, Lee ML, Friedman TC. High-dose vitamin D supplementation in people with prediabetes and hypovitaminosis D. *Diabetes Care* 2013;36:260–266
- Holman RR, Haffner SM, McMurray JJ, et al.; NAVIGATOR Study Group. Effect of nateglinide on the incidence of diabetes and cardiovascular events. *N Engl J Med* 2010;362:1463–1476
- Chiasson JL, Josse RG, Gomis R, Hanefeld M, Karasik A, Laakso M STOP-NIDDM Trial Research Group. Acarbose for prevention of type 2 diabetes mellitus: the STOP-NIDDM randomised trial. *Lancet* 2002; 359:2072–2077
